# Supplementary material for: GNAi2/gip2-Regulated Transcriptome and Its Therapeutic Significance in Ovarian Cancer
Source: MDPI journal article supplement (doi:10.3390/biom11081211), 2021-08-14
Supplement: s1 [file s1]

**Table S1. Reverse transcription-quantitative PCR primer sequences.**

| Gene          | Primers                                                     |
|---------------|-------------------------------------------------------------|
| <i>CAGE1</i>  | FP: AAGCCCAGAGAAAAAGCCAGA<br>RP: ATGTACAAGTTATATGCCAACATGG  |
| <i>CCL20</i>  | FP: CCAAGAGTTTGCTCCTGGCT<br>RP: TGCTTGCTGCTTCTGATTCTG       |
| <i>FYN</i>    | FP: TGACCTCCATCCCCAACTA<br>RP: TTCCCACCAATCTCCTTCC          |
| <i>Gip2</i>   | FP: AGCTGAGGACGAGGAGATGA<br>RP: GGATGATGGACGTGTCTGTG        |
| <i>IL6</i>    | FP: ACTCACCTCTTCAGAACGAATTG<br>RP: CCATCTTTGGAAGGTTTCAGGTTG |
| <i>KDR</i>    | FP: CTCTTGATCTGCCCAGGCTC<br>RP: GGCTCCAGTGTCATTTCCGA        |
| <i>UQCRC1</i> | FP: GCCGGGGCACAAGTGCTAT<br>RP: CTTGGACAGCGCCTTGATGT         |
| <i>VIP</i>    | FP: CCAGGCATGCTGATGGAGTT<br>RP: CCCTCACTGCTCCTCTTTCC        |

**Table S2. *Gip2*-dependent Genes Downregulated upon Silencing of *gip2***

|     | <b>GENE</b>     | <b>Name</b>                                                     | <b>GenBank<br/>Accession</b> |
|-----|-----------------|-----------------------------------------------------------------|------------------------------|
| 1.  | <i>ABLIM1</i>   | Actin binding LIM protein 1                                     | NM_001003408                 |
| 2.  | <i>ACKR3</i>    | Atypical chemokine receptor 3                                   | NM_020311                    |
| 3.  | <i>AHNAK2</i>   | AHNAK nucleoprotein 2                                           | NM_138420                    |
| 4.  | <i>ANKDD1A</i>  | Ankyrin repeat and death domain containing 1A                   | NM_182703                    |
| 5.  | <i>AOAH</i>     | Acyloxyacyl hydrolase (neutrophil)                              | NM_001637                    |
| 6.  | <i>APBA1</i>    | Amyloid beta (A4) precursor protein-binding, family A, member 1 | NM_001163                    |
| 7.  | <i>APOC1</i>    | Apolipoprotein C-I                                              | NM_001645                    |
| 8.  | <i>ARHGEF28</i> | Rho guanine nucleotide exchange factor (GEF) 28                 | NM_001177693                 |
| 9.  | <i>ASS1</i>     | Argininosuccinate synthase 1                                    | NM_000050                    |
| 10. | <i>ATAT1</i>    | Alpha tubulin acetyltransferase 1                               | NM_024909                    |
| 11. | <i>BAD</i>      | BCL2-associated agonist of cell death                           | AK309150                     |
| 12. | <i>BARX2</i>    | BARX homeobox 2                                                 | NM_003658                    |
| 13. | <i>BCAS1</i>    | Breast carcinoma amplified sequence 1                           | NM_003657                    |
| 14. | <i>BMF</i>      | Bcl2 modifying factor                                           | NM_001003940                 |
| 15. | <i>C1QTNF6</i>  | C1q and tumor necrosis factor related protein 6                 | NM_031910                    |
| 16. | <i>CABP2</i>    | Calcium binding protein 2                                       | NM_016366                    |
| 17. | <i>CAGE1</i>    | Cancer antigen 1                                                | NM_001170693                 |
| 18. | <i>CCDC81</i>   | Coiled-coil domain containing 81                                | NM_021827                    |
| 19. | <i>CCDC87</i>   | Coiled-coil domain containing 87                                | NM_018219                    |
| 20. | <i>CCL20</i>    | Chemokine (C-C motif) ligand 20                                 | NM_004591                    |
| 21. | <i>CD163L1</i>  | CD163 molecule-like 1                                           | NM_174941                    |
| 22. | <i>CD24</i>     | CD24 molecule                                                   | NM_013230                    |
| 23. | <i>CD244</i>    | CD244 molecule, natural killer cell receptor 2B4                | NM_001166663                 |
| 24. | <i>COBL</i>     | Cordon-bleu WH2 repeat protein                                  | NM_015198                    |
| 25. | <i>COL16A1</i>  | Collagen, type XVI, alpha 1                                     | NM_001856                    |
| 26. | <i>CPB1</i>     | Carboxypeptidase B1 (tissue)                                    | NM_001871                    |
| 27. | <i>CPXM2</i>    | Carboxypeptidase X (M14 family), member 2                       | NM_198148                    |
| 28. | <i>CSF1R</i>    | Colony stimulating factor 1 receptor                            | NM_005211                    |
| 29. | <i>CT45A1</i>   | Cancer/testis antigen family 45, member A1                      | NM_001017417                 |
| 30. | <i>CT45A5</i>   | Cancer/testis antigen family 45, member A5                      | NM_001007551                 |
| 31. | <i>CT47A11</i>  | Cancer/testis antigen family 47, member A11                     | NM_173571                    |
| 32. | <i>CTAG1A</i>   | Cancer/testis antigen 1A                                        | NM_139250                    |

|     |                 |                                                                                   |                 |
|-----|-----------------|-----------------------------------------------------------------------------------|-----------------|
| 33. | <i>CTLA4</i>    | Cytotoxic T-lymphocyte-associated protein 4                                       | NM_005214       |
| 34. | <i>CYTH4</i>    | Cytohesin 4                                                                       | NM_013385       |
| 35. | <i>DCDC2</i>    | Doublecortin domain containing 2                                                  | NM_016356       |
| 36. | <i>DHRS2</i>    | Dehydrogenase/reductase (SDR family) member 2                                     | NM_182908       |
| 37. | <i>DMBX1</i>    | Diencephalon/mesencephalon homeobox 1                                             | NM_147192       |
| 38. | <i>DNASE1L3</i> | Deoxyribonuclease I-like 3                                                        | NM_004944       |
| 39. | <i>DSCAML1</i>  | Down syndrome cell adhesion molecule like 1                                       | NM_020693       |
| 40. | <i>ECM1</i>     | Extracellular matrix protein 1                                                    | NM_004425       |
| 41. | <i>EPB42</i>    | Erythrocyte membrane protein band 4.2                                             | NM_000119       |
| 42. | <i>FAM129A</i>  | Family with sequence similarity 129, member A                                     | NM_052966       |
| 43. | <i>FAM170A</i>  | Family with sequence similarity 170, member A                                     | NM_182761       |
| 44. | <i>FCN2</i>     | Ficolin (collagen/fibrinogen domain containing lectin) 2                          | NM_004108       |
| 45. | <i>GPR17</i>    | G protein-coupled receptor 17                                                     | BX538082        |
| 46. | <i>GPT</i>      | Glutamic-pyruvate transaminase (alanine aminotransferase)                         | NM_005309       |
| 47. | <i>GRID1</i>    | Glutamate receptor, ionotropic, delta 1                                           | NM_017551       |
| 48. | <i>HEATR4</i>   | HEAT repeat containing 4                                                          | NM_203309       |
| 49. | <i>HES2</i>     | Hes family bhlh transcription factor 2                                            | NM_019089       |
| 50. | <i>HES7</i>     | Hes family bhlh transcription factor 7                                            | NM_001165967    |
| 51. | <i>HKDC1</i>    | Hexokinase domain containing 1                                                    | NM_025130       |
| 52. | <i>HTR1A</i>    | 5-hydroxytryptamine (serotonin) receptor 1A, G protein-coupled                    | NM_000524       |
| 53. | <i>HYAL1</i>    | Hyaluronoglucosaminidase 1                                                        | NM_153281       |
| 54. | <i>IL6R</i>     | Interleukin 6 receptor                                                            | NM_000565       |
| 55. | <i>KATNAL2</i>  | Katanin p60 subunit A-like 2                                                      | NM_031303       |
| 56. | <i>KCNMB2</i>   | Potassium large conductance calcium-activated channel, subfamily M, beta member 2 | NM_181361       |
| 57. | <i>KDR</i>      | Kinase insert domain receptor (a type III receptor tyrosine kinase)               | NM_002253       |
| 58. | <i>KIAA0825</i> | Kiaa0825                                                                          | NM_173665       |
| 59. | <i>KIAA1217</i> | Kiaa1217                                                                          | NM_019590       |
| 60. | <i>KIAA1244</i> | Kiaa1244                                                                          | NM_020340       |
| 61. | <i>LAMP3</i>    | Lysosomal-associated membrane protein 3                                           | NM_014398       |
| 62. | <i>LAX1</i>     | Lymphocyte transmembrane adaptor 1                                                | NM_017773       |
| 63. | <i>LGI2</i>     | Leucine-rich repeat LGI family, member 2                                          | NM_018176       |
| 64. | <i>LMO1</i>     | LIM domain only 1 (rhombotin 1)                                                   | NM_002315       |
| 65. | <i>LONRF3</i>   | LON peptidase N-terminal domain and ring finger 3                                 | ENST00000365713 |
| 66. | <i>LOXHD1</i>   | Lipoxygenase homology domains 1                                                   | AK127869        |
| 67. | <i>LRRC1</i>    | Leucine rich repeat containing 1                                                  | NM_018214       |
| 68. | <i>MPPED1</i>   | Metallophosphoesterase domain containing 1                                        | NM_001044370    |

|      |                |                                                                     |              |
|------|----------------|---------------------------------------------------------------------|--------------|
| 69.  | <i>MUC5B</i>   | Mucin 5B, oligomeric mucus/gel-forming                              | NM_002458    |
| 70.  | <i>NEURL2</i>  | Neuralized E3 ubiquitin protein ligase 2                            | NM_080749    |
| 71.  | <i>NHS</i>     | Nance-Horan syndrome (congenital cataracts and dental anomalies)    | NM_198270    |
| 72.  | <i>NKG7</i>    | Natural killer cell group 7 sequence                                | NM_005601    |
| 73.  | <i>NRG3</i>    | Neuregulin 3                                                        | NM_001010848 |
| 74.  | <i>OR1L4</i>   | Olfactory receptor, family 1, subfamily L, member 4                 | NM_001005235 |
| 75.  | <i>OR2Z1</i>   | Olfactory receptor, family 2, subfamily Z, member 1                 | NM_001004699 |
| 76.  | <i>OR52H1</i>  | Olfactory receptor, family 52, subfamily H, member 1                | NM_001005289 |
| 77.  | <i>OR5J2</i>   | Olfactory receptor, family 5, subfamily J, member 2                 | NM_001005492 |
| 78.  | <i>OR6P1</i>   | Olfactory receptor, family 6, subfamily P, member 1                 | NM_001160325 |
| 79.  | <i>OTOP1</i>   | Otopetrin 1                                                         | NM_177998    |
| 80.  | <i>PAG1</i>    | Phosphoprotein associated with glycosphingolipid microdomains 1     | NM_018440    |
| 81.  | <i>PAGE1</i>   | P antigen family, member 1 (prostate associated)                    | NM_003785    |
| 82.  | <i>PAPPA</i>   | Pregnancy-associated plasma protein A, pappalysin 1                 | NM_002581    |
| 83.  | <i>PDE4DIP</i> | Phosphodiesterase 4D interacting protein                            | NM_001198834 |
| 84.  | <i>PDE9A</i>   | Phosphodiesterase 9A                                                | NM_002606    |
| 85.  | <i>PDLIM5</i>  | PDZ and LIM domain 5                                                | NM_001011515 |
| 86.  | <i>PITPNM3</i> | PITPNM family member 3                                              | NM_031220    |
| 87.  | <i>PLA2G4A</i> | Phospholipase A2, group IVA (cytosolic, calcium-dependent)          | NM_024420    |
| 88.  | <i>PLCD4</i>   | Phospholipase C, delta 4                                            | AY512961     |
| 89.  | <i>PLD5</i>    | Phospholipase D family, member 5                                    | NM_152666    |
| 90.  | <i>PLEKHB1</i> | Pleckstrin homology domain containing, family B (evectins) member 1 | NM_021200    |
| 91.  | <i>PLXDC2</i>  | Plexin domain containing 2                                          | NM_032812    |
| 92.  | <i>PROP1</i>   | PROP paired-like homeobox 1                                         | NM_006261    |
| 93.  | <i>PSG1</i>    | Pregnancy specific beta-1-glycoprotein 1                            | NM_006905    |
| 94.  | <i>PSG3</i>    | Pregnancy specific beta-1-glycoprotein 3                            | NM_021016    |
| 95.  | <i>PSG6</i>    | Pregnancy specific beta-1-glycoprotein 6                            | NM_002782    |
| 96.  | <i>PSG8</i>    | Pregnancy specific beta-1-glycoprotein 8                            | NM_182707    |
| 97.  | <i>PSG9</i>    | Pregnancy specific beta-1-glycoprotein 9                            | NM_002784    |
| 98.  | <i>RNF180</i>  | Ring finger protein 180                                             | NM_178532    |
| 99.  | <i>RNPC3</i>   | RNA-binding region (RNP1, RRM) containing 3                         | XM_005271009 |
| 100. | <i>S100A16</i> | S100 calcium binding protein A16                                    | NM_080388    |
| 101. | <i>S1PR4</i>   | Sphingosine-1-phosphate receptor 4                                  | NM_003775    |
| 102. | <i>SH2D1A</i>  | SH2 domain containing 1A                                            | NM_001114937 |
| 103. | <i>SHBG</i>    | Sex hormone-binding globulin                                        | NM_001040    |
| 104. | <i>SIAH3</i>   | Siah E3 ubiquitin protein ligase family member 3                    | NM_198849    |

|      |                  |                                                                                   |                 |
|------|------------------|-----------------------------------------------------------------------------------|-----------------|
| 105. | <i>SIM2</i>      | Single-minded family bhlh transcription factor 2                                  | NM_009586       |
| 106. | <i>SLC24A3</i>   | Solute carrier family 24 (sodium/potassium/calcium exchanger), member 3           | NM_020689       |
| 107. | <i>SNAI3</i>     | Snail family zinc finger 3                                                        | NM_178310       |
| 108. | <i>SORL1</i>     | Sortilin-related receptor, L(DLR class) A repeats containing                      | NM_003105       |
| 109. | <i>SPATA31D3</i> | SPATA31 subfamily D, member 3                                                     | NM_207416       |
| 110. | <i>SSX4B</i>     | Synovial sarcoma, X breakpoint 4B                                                 | NM_001034832    |
| 111. | <i>STAG3</i>     | Stromal antigen 3                                                                 | NM_001282717    |
| 112. | <i>STARD13</i>   | Star-related lipid transfer (START) domain containing 13                          | NM_178006       |
| 113. | <i>SYNE1</i>     | Spectrin repeat containing, nuclear envelope 1                                    | AL713682        |
| 114. | <i>SYT8</i>      | Synaptotagmin VIII                                                                | NM_138567       |
| 115. | <i>TDO2</i>      | Tryptophan 2,3-dioxygenase                                                        | NM_005651       |
| 116. | <i>TEC</i>       | Tec protein tyrosine kinase                                                       | NM_003215       |
| 117. | <i>TFAP2E</i>    | Transcription factor AP-2 epsilon (activating enhancer binding protein 2 epsilon) | NM_178548       |
| 118. | <i>TGFB1</i>     | Transforming growth factor, beta-induced, 68kda                                   | NM_000358       |
| 119. | <i>TIPARP</i>    | TCDD-inducible poly(ADP-ribose) polymerase                                        | NM_001184717    |
| 120. | <i>TM4SF19</i>   | Transmembrane 4 L six family member 19                                            | NM_138461       |
| 121. | <i>TMEM106A</i>  | Transmembrane protein 106A                                                        | NM_145041       |
| 122. | <i>TMEM131</i>   | Transmembrane protein 131                                                         | NM_015348       |
| 123. | <i>TP63</i>      | Tumor protein p63                                                                 | NM_003722       |
| 124. | <i>TTC39A</i>    | Tetratricopeptide repeat domain 39A                                               | NM_001080494    |
| 125. | <i>UGT2B11</i>   | UDP glucuronosyltransferase 2 family, polypeptide B11                             | NM_001073       |
| 126. | <i>ULK2</i>      | Unc-51 like autophagy activating kinase 2                                         | NM_014683       |
| 127. | <i>UPP1</i>      | Uridine phosphorylase 1                                                           | NM_181597       |
| 128. | <i>UQCRH</i>     | Ubiquinol-cytochrome c reductase hinge protein                                    | NM_006004       |
| 129. | <i>VIP</i>       | Vasoactive intestinal peptide                                                     | NM_003381       |
| 130. | <i>VIPR2</i>     | Vasoactive intestinal peptide receptor 2                                          | NM_003382       |
| 131. | <i>WDR20</i>     | WD repeat domain 20                                                               | NM_001242415    |
| 132. | <i>WNT5A</i>     | Wingless-type MMTV integration site family, member 5A                             | NM_003392       |
| 133. | <i>ZG16B</i>     | Zymogen granule protein 16B                                                       | NM_145252       |
| 134. | <i>ZNF385D</i>   | Zinc finger protein 385D                                                          | ENST00000494108 |
| 135. | <i>ZNRF2</i>     | Zinc and ring finger 2                                                            | TCONS_00012988  |

**Table S3. Oncogenic Profile of *gip2*-dependent Genes**

|     | GENE            | Oncogenic Role                                                                           | References                                                               |
|-----|-----------------|------------------------------------------------------------------------------------------|--------------------------------------------------------------------------|
| 1.  | <i>ABLIM1</i>   | Cell migration in hepatocellular carcinoma                                               | Dong <i>et al.</i> , 2020 <sup>1</sup>                                   |
| 2.  | <i>ACKR3</i>    | Multiple oncogenic pathways in breast, lung, and brain cancer                            | Neves <i>et al.</i> , 2019 <sup>2</sup>                                  |
| 3.  | <i>AHNAK2</i>   | Oncogenic and prognostic marker in clear cell renal cell carcinoma and pancreatic cancer | Wang <i>et al.</i> , 2017; Lu <i>et al.</i> , 2017 <sup>3,4</sup>        |
| 4.  | <i>APBA1</i>    | Pro-survival gene in cervical cancer cells                                               | Guo <i>et al.</i> , 2019 <sup>5</sup>                                    |
| 5.  | <i>APOC1</i>    | Oncogenic metastasis in clear cell renal cell carcinoma                                  | Li <i>et al.</i> , 2020 <sup>6</sup>                                     |
| 6.  | <i>ARHGEF28</i> | Cell Motility and invasion in Colon carcinoma                                            | Yu <i>et al.</i> , 2011 <sup>7</sup>                                     |
| 7.  | <i>ASS1</i>     | Gastric cancer invasion                                                                  | Tsai <i>et al.</i> , 2018 <sup>8</sup>                                   |
| 8.  | <i>ATAT1</i>    | Proliferation and invasion colon cancer cells                                            | Oh <i>et al.</i> , 2017 <sup>9</sup>                                     |
| 9.  | <i>BAD</i>      | Marker of triple negative and poor outcome in breast cancer                              | Boac <i>et al.</i> , 2019 <sup>10</sup>                                  |
| 10. | <i>C1QTNF6</i>  | Oncogenic in non-small cell lung carcinoma cells                                         | Zhang and Feng, 2021 <sup>11</sup>                                       |
| 11. | <i>CAGE1</i>    | Biomarker in different cancers                                                           | Park <i>et al.</i> , 2003 <sup>12</sup>                                  |
| 12. | <i>CCDC81</i>   | Biomarker in nasopharyngeal and small cell lung cancers                                  | Zhang <i>et al.</i> , 2019 Iwakawa <i>et al.</i> , 2013 <sup>13,14</sup> |
| 13. | <i>CCL20</i>    | Promotes accelerated cancer growth in multiple cancers                                   | Kadamoto <i>et al.</i> , 2020 <sup>15</sup>                              |
| 14. | <i>CD24</i>     | Cancer progression & Metastasis in multiple cancers                                      | Duex <i>et al.</i> , 2017 <sup>16</sup>                                  |
| 15. | <i>CD244</i>    | Therapeutic target in head and neck cancer                                               | Agresta <i>et al.</i> , 2020 <sup>17</sup>                               |
| 16. | <i>COL16A1</i>  | Oncogenic proliferation in oral cancer                                                   | Ratzinger <i>et al.</i> , 2011 <sup>18</sup>                             |
| 17. | <i>CPB1</i>     | Pancreatic cancer susceptibility gene,                                                   | Tamura <i>et al.</i> , 2018 <sup>19</sup>                                |
| 18. | <i>CPXM2</i>    | Proliferation and migration in gastric cancer cells; poor prognosis marker               | Niu <i>et al.</i> , 2019 <sup>20</sup>                                   |
| 19. | <i>CSF1R</i>    | Oncogenic in T cell lymphoma; proliferation and migration in ovarian cancer cells        | Chambers <i>et al.</i> , 2010 <sup>21,22</sup>                           |
| 20. | <i>CT45A1</i>   | Protooncogene in breast cancer                                                           | Gao <i>et al.</i> , 2014 <sup>23</sup>                                   |
| 21. | <i>CTLA4</i>    | Poor prognosis indicator in multiple cancers                                             | Santoni <i>et al.</i> , 2018; Zhao <i>et al.</i> , 2018 <sup>24,25</sup> |
| 22. | <i>CYTH4</i>    | Overexpression in ovarian cancers                                                        | Zhang <i>et al.</i> , 2020 <sup>26</sup>                                 |
| 23. | <i>DCDC2</i>    | Oncogenic migration in prostate cancer                                                   | Longoni <i>et al.</i> , 2013 <sup>27</sup>                               |
| 24. | <i>DMBX1</i>    | Oncogenic proliferation in many cancers                                                  | Luo <i>et al.</i> , 2019 <sup>28</sup>                                   |
| 25. | <i>ECM1</i>     | Metabolic reprogramming in gastric cancer                                                | Meng <i>et al.</i> , 2018 <sup>29</sup>                                  |
| 26. | <i>FAM129A</i>  | Proliferation and invasive migration in non-small cell lung carcinoma cells              | Zhang <i>et al.</i> , 2019 <sup>30</sup>                                 |

|     |                |                                                                                  |                                                                           |
|-----|----------------|----------------------------------------------------------------------------------|---------------------------------------------------------------------------|
| 27. | <i>GPT1</i>    | Hepatocellular carcinoma growth and progression                                  | Guo <i>et al.</i> , 2020 <sup>31</sup>                                    |
| 28. | <i>GRID1</i>   | Negatively correlated with overall survival of endometrial cancer patients,      | Wang <i>et al.</i> , 2020 <sup>32</sup>                                   |
| 29. | <i>HES2</i>    | Associated with colorectal cancer,                                               | Kato & Kato, 2007 <sup>33</sup>                                           |
| 30. | <i>HES7</i>    | Cancer stemness in many cancers, EMT:                                            | Song <i>et al.</i> , 2019 <sup>34</sup>                                   |
| 31. | <i>HKDC1</i>   | Tumorigenesis & Glycolytic pathway lung adenocarcinoma,                          | Wang <i>et al.</i> , 2020 <sup>35</sup>                                   |
| 32. | <i>HTR1A</i>   | Expression in breast cancer cells,                                               | Kopparapu <i>et al.</i> , 2013 <sup>36</sup>                              |
| 33. | <i>HYAL1</i>   | Tumor cell proliferation, migration, invasion, and angiogenesis in breast cancer | Tan <i>et al.</i> , 2011 <sup>37</sup>                                    |
| 34. | <i>IL6R</i>    | Tumor promotion in multiple cancers; EMT in colorectal cancers                   | Rokavec <i>et al.</i> , 2014 <sup>38</sup>                                |
| 35. | <i>KDR</i>     | Proliferation and cancer cell metabolism in ovarian cancer,                      | Cybulski <i>et al.</i> , 2012; Chen <i>et al.</i> , 2019 <sup>39,40</sup> |
| 36. | <i>LAMP3</i>   | Associated with poor prognosis in ovarian cancer                                 | Wang <i>et al.</i> , 2017 <sup>41</sup>                                   |
| 37. | <i>LAX1</i>    | Identified as shorter DFS marker in ovarian cancer                               | Yin <i>et al.</i> , 2019 <sup>42</sup>                                    |
| 38. | <i>LMO1</i>    | Tumorigenic in multiple cancers                                                  | Zhao <i>et al.</i> , 2021 <sup>43</sup>                                   |
| 39. | <i>LOXHD1</i>  | Associated with breast cancer growth and progression,                            | Schulten <i>et al.</i> , 2017 <sup>44</sup>                               |
| 40. | <i>LRRC1</i>   | Oncogenic role in hepatocellular carcinoma                                       | Li <i>et al.</i> , 2013 <sup>45</sup>                                     |
| 41. | <i>MUC5B</i>   | Tumor promotion in multiple cancers including gastrointestinal cancers           | Lahdaoui <i>et al.</i> , 2017 <sup>46</sup>                               |
| 42. | <i>NEURL2</i>  | Stemness in lung cancer cells,                                                   | Liu <i>et al.</i> , 2019 <sup>47</sup>                                    |
| 43. | <i>NRG3</i>    | Oncogenic signaling pathways in many cancers                                     | Montero <i>et al.</i> , 2008 <sup>48</sup>                                |
| 44. | <i>PAG1</i>    | Confers radio-resistance laryngeal cancer                                        | Shen <i>et al.</i> , 2018 <sup>49</sup>                                   |
| 45. | <i>PAGE1</i>   | Tumor antigen in many different cancers                                          | Chen <i>et al.</i> , 1998 <sup>50</sup>                                   |
| 46. | <i>PAPPA</i>   | Oncogenic in many cancers                                                        | Guo <i>et al.</i> , 2018 <sup>51</sup>                                    |
| 47. | <i>PDE4DIP</i> | Oncogenic in pineoblastoma                                                       | Snuderl <i>et al.</i> , 2018 <sup>52</sup>                                |
| 48. | <i>PDE9A</i>   | Expression is correlated with malignant breast cancer                            | Karami-Tehrani <i>et al.</i> , 2012 <sup>53</sup>                         |
| 49. | <i>PDLIM5</i>  | Migration and Invasion in lung cancer cells,                                     | Shi <i>et al.</i> , 2020 <sup>54</sup>                                    |
| 50. | <i>PITPNM3</i> | Breast cancer metastasis                                                         | Chen <i>et al.</i> , 2011 <sup>55</sup>                                   |
| 51. | <i>PLA2G4A</i> | Associated with poor prognosis in many cancers including acute myeloid leukemia  | Bai <i>et al.</i> , 2020 <sup>56</sup>                                    |
| 52. | <i>PLCD4</i>   | Associated with increased proliferation of breast cancer cells                   | Leung <i>et al.</i> , 2004 <sup>57</sup>                                  |
| 53. | <i>PLXDC2</i>  | Associated with paclitaxel resistance in ovarian cancer                          | Wang <i>et al.</i> , 2018 <sup>58</sup>                                   |
| 54. | <i>PROP1</i>   | Persistent expression is associated with pituitary tumors                        | Cushman <i>et al.</i> , 2001 <sup>59</sup>                                |
| 55. | <i>PSG1</i>    | Associated with chemoresistance in breast cancer                                 | He <i>et al.</i> , 2016 <sup>60</sup>                                     |
| 56. | <i>PSG6</i>    | Associated with increased mortality in Stomach Adenocarcinoma                    | Wang <i>et al.</i> , 2020 <sup>61</sup>                                   |

|     |                |                                                                                                              |                                                                             |
|-----|----------------|--------------------------------------------------------------------------------------------------------------|-----------------------------------------------------------------------------|
| 57. | <i>PSG9</i>    | Accelerated growth and progression in many cancers including breast cancer,                                  | Yang <i>et al.</i> , 2016 <sup>62</sup>                                     |
| 58. | <i>S100A16</i> | Promotes Metastasis in pancreatic adenoductal carcinoma cells                                                | Fang <i>et al.</i> , 2021 <sup>63</sup>                                     |
| 59. | <i>S1PR4</i>   | Invasion and metastasis of prostate cancer cells,                                                            | Lee <i>et al.</i> , 2019 <sup>64</sup>                                      |
| 60. | <i>SH2D1A</i>  | Associated with metastasis in breast cancer,                                                                 | Park <i>et al.</i> , 2020 <sup>65</sup>                                     |
| 61. | <i>SHBG</i>    | Associated with poor prognosis in ovarian cancer                                                             | Huang <i>et al.</i> , 2013 <sup>66</sup>                                    |
| 62. | <i>SNAI3</i>   | Tumor progression in Colorectal cancer                                                                       | Chen <i>et al.</i> , 2018 <sup>67</sup>                                     |
| 63. | <i>SORL1</i>   | Contributes to therapy resistance in breast cancer                                                           | Al-Akhrass <i>et al.</i> , 2021 <sup>68</sup>                               |
| 64. | <i>SYNE1</i>   | Hepatocellular carcinoma growth and progression,                                                             | Faraj Shaglouf <i>et al.</i> , 2020 <sup>69</sup>                           |
| 65. | <i>SYT8</i>    | Peritoneal Metastasis of gastric Cancer                                                                      | Kanda <i>et al.</i> , 2018 <sup>70</sup>                                    |
| 66. | <i>TDO2</i>    | Proliferation, migration, and invasion of ovarian cancer cells                                               | Zhao <i>et al.</i> , 2021 <sup>71</sup>                                     |
| 67. | <i>TEC</i>     | Oncogenic role in many cancers including hepatocellular carcinoma                                            | Vanova <i>et al.</i> , 2017 <sup>72</sup>                                   |
| 68. | <i>TFAP2E</i>  | Associated with chemoresistance colorectal cancer                                                            | Ebert <i>et al.</i> , 2012 <sup>73</sup>                                    |
| 69. | <i>TGFBI</i>   | Therapy resistance in breast cancer                                                                          | Palomeras <i>et al.</i> , 2019; Huynh <i>et al.</i> , 2019 <sup>74,75</sup> |
| 70. | <i>TP63</i>    | Invasive phenotype in basal carcinoma                                                                        | Palmbos <i>et al.</i> , 2019 <sup>76</sup>                                  |
| 71. | <i>UPP1</i>    | Potential role in thyroid carcinoma epithelial-mesenchymal transition                                        | Guan <i>et al.</i> , 2019 <sup>77</sup>                                     |
| 72. | <i>UQCRH</i>   | Indicator of poor prognosis in hepatocellular carcinoma                                                      | Park <i>et al.</i> , 2017 <sup>78</sup>                                     |
| 73. | <i>VIP</i>     | Oncogenic autocrine factor in many cancers including lung cancer                                             | Moody <i>et al.</i> , 2000 <sup>79</sup>                                    |
| 74. | <i>VIPR2</i>   | Oncogenic signaling pathways in many cancers,                                                                | Moody <i>et al.</i> , 2016 <sup>80</sup>                                    |
| 75. | <i>WDR20</i>   | Promotes cancer cell survival in multiple cancers including and prostate cancer                              | McClurg <i>et al.</i> , 2015 <sup>81</sup>                                  |
| 76. | <i>WNT5A</i>   | Cancer cell invasion, metastasis, metabolism, and inflammation in many cancers,                              | Asem <i>et al.</i> , 2016 <sup>82</sup>                                     |
| 77. | <i>ZG16B</i>   | Oncogenic in many cancers; cell cycle progression via Wnt/b-CNN pathway in colorectal cancer                 | Escudero-Paniagua <i>et al.</i> , 2020 <sup>83</sup>                        |
| 78. | <i>ZNRF2</i>   | Stimulates cell proliferation along with the suppression of apoptosis in non-small cell lung carcinoma cells | Zhang <i>et al.</i> , 2016 <sup>84</sup>                                    |



## Cited References

- 1 Dong, X. *et al.* Rictor promotes cell migration and actin polymerization through regulating ABLIM1 phosphorylation in Hepatocellular Carcinoma. *Int J Biol Sci* **16**, 2835-2852, doi:10.7150/ijbs.46285 (2020).
- 2 Neves, M. *et al.* The Role of ACKR3 in Breast, Lung, and Brain Cancer. *Mol Pharmacol* **96**, 819-825, doi:10.1124/mol.118.115279 (2019).
- 3 Wang, M. *et al.* AHNAK2 is a Novel Prognostic Marker and Oncogenic Protein for Clear Cell Renal Cell Carcinoma. *Theranostics* **7**, 1100-1113, doi:10.7150/thno.18198 (2017).
- 4 Lu, D., Wang, J., Shi, X., Yue, B. & Hao, J. AHNAK2 is a potential prognostic biomarker in patients with PDAC. *Oncotarget* **8**, 31775-31784, doi:10.18632/oncotarget.15990 (2017).
- 5 Guo, W. *et al.* Effect of hyperoside on cervical cancer cells and transcriptome analysis of differentially expressed genes. *Cancer Cell Int* **19**, 235, doi:10.1186/s12935-019-0953-4 (2019).
- 6 Li, Y. L. *et al.* ApoC1 promotes the metastasis of clear cell renal cell carcinoma via activation of STAT3. *Oncogene* **39**, 6203-6217, doi:10.1038/s41388-020-01428-3 (2020).
- 7 Yu, H. G. *et al.* p190RhoGEF (Rgnef) promotes colon carcinoma tumor progression via interaction with focal adhesion kinase. *Cancer Res* **71**, 360-370, doi:10.1158/0008-5472.CAN-10-2894 (2011).
- 8 Tsai, C. Y. *et al.* Argininosuccinate synthetase 1 contributes to gastric cancer invasion and progression by modulating autophagy. *FASEB J* **32**, 2601-2614, doi:10.1096/fj.201700094R (2018).
- 9 Oh, S. *et al.* Genetic disruption of tubulin acetyltransferase, alphaTAT1, inhibits proliferation and invasion of colon cancer cells through decreases in Wnt1/beta-catenin signaling. *Biochem Biophys Res Commun* **482**, 8-14, doi:10.1016/j.bbrc.2016.11.039 (2017).
- 10 Boac, B. M. *et al.* Expression of the BAD pathway is a marker of triple-negative status and poor outcome. *Sci Rep* **9**, 17496, doi:10.1038/s41598-019-53695-0 (2019).
- 11 Zhang, W. & Feng, G. C1QTNF6 regulates cell proliferation and apoptosis of NSCLC in vitro and in vivo. *Biosci Rep* **41**, doi:10.1042/BSR20201541 (2021).
- 12 Park, S. *et al.* Identification and characterization of a novel cancer/testis antigen gene CAGE-1. *Biochim Biophys Acta* **1625**, 173-182, doi:10.1016/s0167-4781(02)00620-6 (2003).
- 13 Zhang, J. Z., Wu, Z. H. & Cheng, Q. Screening and identification of key biomarkers in nasopharyngeal carcinoma: Evidence from bioinformatic analysis. *Medicine (Baltimore)* **98**, e17997, doi:10.1097/MD.00000000000017997 (2019).
- 14 Iwakawa, R. *et al.* Genome-wide identification of genes with amplification and/or fusion in small cell lung cancer. *Genes Chromosomes Cancer* **52**, 802-816, doi:10.1002/gcc.22076 (2013).
- 15 Kadomoto, S., Izumi, K. & Mizokami, A. The CCL20-CCR6 Axis in Cancer Progression. *Int J Mol Sci* **21**, doi:10.3390/ijms21155186 (2020).
- 16 Duex, J. E. *et al.* Nuclear CD24 Drives Tumor Growth and Is Predictive of Poor Patient Prognosis. *Cancer Res* **77**, 4858-4867, doi:10.1158/0008-5472.CAN-17-0367 (2017).
- 17 Agresta, L. *et al.* CD244 represents a new therapeutic target in head and neck squamous cell carcinoma. *J Immunother Cancer* **8**, doi:10.1136/jitc-2019-000245 (2020).
- 18 Ratzinger, S., Grassel, S., Dowejko, A., Reichert, T. E. & Bauer, R. J. Induction of type XVI collagen expression facilitates proliferation of oral cancer cells. *Matrix Biol* **30**, 118-125, doi:10.1016/j.matbio.2011.01.001 (2011).
- 19 Tamura, K. *et al.* Mutations in the pancreatic secretory enzymes CPA1 and CPB1 are associated with pancreatic cancer. *Proc Natl Acad Sci U S A* **115**, 4767-4772, doi:10.1073/pnas.1720588115 (2018).

- 20 Niu, G. *et al.* Overexpression of CPXM2 predicts an unfavorable prognosis and promotes the proliferation and migration of gastric cancer. *Oncol Rep* **42**, 1283-1294, doi:10.3892/or.2019.7254 (2019).
- 21 Chambers, S. K. Role of CSF-1 in progression of epithelial ovarian cancer. *Future Oncol* **5**, 1429-1440, doi:10.2217/fon.09.103 (2009).
- 22 Murga-Zamalloa, C. *et al.* Colony-Stimulating Factor 1 Receptor (CSF1R) Activates AKT/mTOR Signaling and Promotes T-Cell Lymphoma Viability. *Clin Cancer Res* **26**, 690-703, doi:10.1158/1078-0432.CCR-19-1486 (2020).
- 23 Shang, B. *et al.* CT45A1 acts as a new proto-oncogene to trigger tumorigenesis and cancer metastasis. *Cell death & disease* **5**, e1285, doi:10.1038/cddis.2014.244 (2014).
- 24 Santoni, G. *et al.* High CTLA-4 expression correlates with poor prognosis in thymoma patients. *Oncotarget* **9**, 16665-16677, doi:10.18632/oncotarget.24645 (2018).
- 25 Zhao, Y. *et al.* Evolving Roles for Targeting CTLA-4 in Cancer Immunotherapy. *Cell Physiol Biochem* **47**, 721-734, doi:10.1159/000490025 (2018).
- 26 Zhang, Q., Wang, Q., Wu, S. & Zhang, J. Clinical implication and immunological characterisation of the ARF-GEF family member CYTH4 in ovarian cancer. *Autoimmunity* **53**, 434-442, doi:10.1080/08916934.2020.1836487 (2020).
- 27 Longoni, N. *et al.* Aberrant expression of the neuronal-specific protein DCDC2 promotes malignant phenotypes and is associated with prostate cancer progression. *Oncogene* **32**, 2315-2324, 2324 e2311-2314, doi:10.1038/onc.2012.245 (2013).
- 28 Luo, J. *et al.* DMBX1 promotes tumor proliferation and regulates cell cycle progression via repressing OTX2-mediated transcription of p21 in lung adenocarcinoma cell. *Cancer Lett* **453**, 45-56, doi:10.1016/j.canlet.2019.03.045 (2019).
- 29 Gan, L. *et al.* Extracellular matrix protein 1 promotes cell metastasis and glucose metabolism by inducing integrin beta4/FAK/SOX2/HIF-1alpha signaling pathway in gastric cancer. *Oncogene* **37**, 744-755, doi:10.1038/onc.2017.363 (2018).
- 30 Zhang, N. *et al.* FAM129A promotes invasion and proliferation by activating FAK signaling pathway in non-small cell lung cancer. *Int J Clin Exp Pathol* **12**, 893-900 (2019).
- 31 Guo, W., Tan, H. Y., Li, S., Wang, N. & Feng, Y. Glutamic-Pyruvic Transaminase 1 Facilitates Alternative Fuels for Hepatocellular Carcinoma Growth-A Small Molecule Inhibitor, Berberine. *Cancers (Basel)* **12**, doi:10.3390/cancers12071854 (2020).
- 32 Wang, H. *et al.* Prognostic value of an autophagy-related gene expression signature for endometrial cancer patients. *Cancer Cell Int* **20**, 306, doi:10.1186/s12935-020-01413-6 (2020).
- 33 Katoh, M. & Katoh, M. Identification and characterization of human HES2, HES3, and HES5 genes in silico. *Int J Oncol* **25**, 529-534 (2004).
- 34 Song, J. *et al.* Epithelial-mesenchymal transition markers screened in a cell-based model and validated in lung adenocarcinoma. *BMC Cancer* **19**, 680, doi:10.1186/s12885-019-5885-9 (2019).
- 35 Wang, X. *et al.* HKDC1 promotes the tumorigenesis and glycolysis in lung adenocarcinoma via regulating AMPK/mTOR signaling pathway. *Cancer Cell Int* **20**, 450, doi:10.1186/s12935-020-01539-7 (2020).
- 36 Kopparapu, P. K., Tinzl, M., Anagnostaki, L., Persson, J. L. & Dizeyi, N. Expression and localization of serotonin receptors in human breast cancer. *Anticancer Res* **33**, 363-370 (2013).
- 37 Tan, J. X. *et al.* Upregulation of HYAL1 expression in breast cancer promoted tumor cell proliferation, migration, invasion and angiogenesis. *PLoS One* **6**, e22836, doi:10.1371/journal.pone.0022836 (2011).
- 38 Rokavec, M. *et al.* IL-6R/STAT3/miR-34a feedback loop promotes EMT-mediated colorectal cancer invasion and metastasis. *J Clin Invest* **124**, 1853-1867, doi:10.1172/JCI73531 (2014).

39 Cybulski, M. *et al.* Cyclin I correlates with VEGFR-2 and cell proliferation in human epithelial ovarian cancer. *Gynecol Oncol* **127**, 217-222, doi:10.1016/j.ygyno.2012.06.038 (2012).

40 Chen, L. *et al.* Apatinib inhibits glycolysis by suppressing the VEGFR2/AKT1/SOX5/GLUT4 signaling pathway in ovarian cancer cells. *Cell Oncol (Dordr)* **42**, 679-690, doi:10.1007/s13402-019-00455-x (2019).

41 Wang, D. *et al.* LAMP3 expression correlated with poor clinical outcome in human ovarian cancer. *Tumour Biol* **39**, 1010428317695014, doi:10.1177/1010428317695014 (2017).

42 Yin, F. *et al.* Microarray-based identification of genes associated with prognosis and drug resistance in ovarian cancer. *J Cell Biochem* **120**, 6057-6070, doi:10.1002/jcb.27892 (2019).

43 Zhao, G. F., Du, L. Q., Zhang, L. & Jia, Y. C. LIM domain only 1: an oncogenic transcription cofactor contributing to the tumorigenesis of multiple cancer types. *Chin Med J (Engl)* **134**, 1017-1030, doi:10.1097/CM9.0000000000001487 (2021).

44 Schulten, H. J. *et al.* Comprehensive molecular biomarker identification in breast cancer brain metastases. *J Transl Med* **15**, 269, doi:10.1186/s12967-017-1370-x (2017).

45 Li, Y., Zhou, B., Dai, J., Liu, R. & Han, Z. G. Aberrant upregulation of LRRC1 contributes to human hepatocellular carcinoma. *Mol Biol Rep* **40**, 4543-4551, doi:10.1007/s11033-013-2549-8 (2013).

46 Lahdaoui, F. *et al.* Depletion of MUC5B mucin in gastrointestinal cancer cells alters their tumorigenic properties: implication of the Wnt/beta-catenin pathway. *Biochem J* **474**, 3733-3746, doi:10.1042/BCJ20170348 (2017).

47 Liu, D. *et al.* Asymmetric Division Gene *Neur12* Mediates *Twist2* Regulation of Self-Renewal of Mouse Lewis Lung Cancer Stem Cells. *J Cancer* **10**, 3381-3388, doi:10.7150/jca.31553 (2019).

48 Montero, J. C. *et al.* Neuregulins and cancer. *Clin Cancer Res* **14**, 3237-3241, doi:10.1158/1078-0432.CCR-07-5133 (2008).

49 Shen, L. *et al.* PAG1 promotes the inherent radioresistance of laryngeal cancer cells via activation of STAT3. *Exp Cell Res* **370**, 127-136, doi:10.1016/j.yexcr.2018.06.014 (2018).

50 Chen, M. E., Lin, S. H., Chung, L. W. & Sikes, R. A. Isolation and characterization of PAGE-1 and GAGE-7. New genes expressed in the LNCaP prostate cancer progression model that share homology with melanoma-associated antigens. *The Journal of biological chemistry* **273**, 17618-17625, doi:10.1074/jbc.273.28.17618 (1998).

51 Guo, Y., Bao, Y., Guo, D. & Yang, W. Pregnancy-associated plasma protein a in cancer: expression, oncogenic functions and regulation. *Am J Cancer Res* **8**, 955-963 (2018).

52 Snuderl, M. *et al.* Recurrent homozygous deletion of DROSHA and microduplication of PDE4DIP in pineoblastoma. *Nat Commun* **9**, 2868, doi:10.1038/s41467-018-05029-3 (2018).

53 Karami-Tehrani, F., Moeinifard, M., Aghaei, M. & Atri, M. Evaluation of PDE5 and PDE9 expression in benign and malignant breast tumors. *Arch Med Res* **43**, 470-475, doi:10.1016/j.arcmed.2012.08.006 (2012).

54 Shi, Y. *et al.* PDLIM5 inhibits STUB1-mediated degradation of SMAD3 and promotes the migration and invasion of lung cancer cells. *The Journal of biological chemistry* **295**, 13798-13811, doi:10.1074/jbc.RA120.014976 (2020).

55 Chen, J. *et al.* CCL18 from tumor-associated macrophages promotes breast cancer metastasis via PITPNM3. *Cancer Cell* **19**, 541-555, doi:10.1016/j.ccr.2011.02.006 (2011).

56 Bai, H., Zhou, M., Zeng, M. & Han, L. PLA2G4A Is a Potential Biomarker Predicting Shorter Overall Survival in Patients with Non-M3/NPM1 Wildtype Acute Myeloid Leukemia. *DNA Cell Biol* **39**, 700-708, doi:10.1089/dna.2019.5187 (2020).

57 Leung, D. W. *et al.* Phospholipase C delta-4 overexpression upregulates ErbB1/2 expression, Erk signaling pathway, and proliferation in MCF-7 cells. *Mol Cancer* **3**, 15, doi:10.1186/1476-4598-3-15 (2004).

- 58 Wang, Y. & Li, H. Identification of proteins associated with paclitaxel resistance of epithelial ovarian cancer using iTRAQ-based proteomics. *Oncol Lett* **15**, 9793-9801, doi:10.3892/ol.2018.8600 (2018).
- 59 Cushman, L. J. *et al.* Persistent Prop1 expression delays gonadotrope differentiation and enhances pituitary tumor susceptibility. *Hum Mol Genet* **10**, 1141-1153, doi:10.1093/hmg/10.11.1141 (2001).
- 60 He, D. X. *et al.* Targeting PSG1 to enhance chemotherapeutic efficacy: new application for anti-coagulant the dicumarol. *Clin Sci (Lond)* **130**, 2267-2276, doi:10.1042/CS20160536 (2016).
- 61 Wang, H., Shen, L., Li, Y. & Lv, J. Integrated characterisation of cancer genes identifies key molecular biomarkers in stomach adenocarcinoma. *J Clin Pathol* **73**, 579-586, doi:10.1136/jclinpath-2019-206400 (2020).
- 62 Yang, L. *et al.* Pregnancy-specific glycoprotein 9 (PSG9), a driver for colorectal cancer, enhances angiogenesis via activation of SMAD4. *Oncotarget* **7**, 61562-61574, doi:10.18632/oncotarget.11146 (2016).
- 63 Fang, D. *et al.* S100A16 promotes metastasis and progression of pancreatic cancer through FGF19-mediated AKT and ERK1/2 pathways. *Cell Biol Toxicol*, doi:10.1007/s10565-020-09574-w (2021).
- 64 Lee, C. F. *et al.* Activation of sphingosine kinase by lipopolysaccharide promotes prostate cancer cell invasion and metastasis via SphK1/S1PR4/matriptase. *Oncogene* **38**, 5580-5598, doi:10.1038/s41388-019-0833-3 (2019).
- 65 Park, S. B., Hwang, K. T., Chung, C. K., Roy, D. & Yoo, C. Causal Bayesian gene networks associated with bone, brain and lung metastasis of breast cancer. *Clin Exp Metastasis* **37**, 657-674, doi:10.1007/s10585-020-10060-0 (2020).
- 66 Huang, R. *et al.* Sex hormone-binding globulin (SHBG) expression in ovarian carcinomas and its clinicopathological associations. *PLoS One* **8**, e83238, doi:10.1371/journal.pone.0083238 (2013).
- 67 Chen, C. *et al.* FOXD4 induces tumor progression in colorectal cancer by regulation of the SNAI3/CDH1 axis. *Cancer biology & therapy* **19**, 1065-1071, doi:10.1080/15384047.2018.1480291 (2018).
- 68 Al-Akhrass, H. *et al.* A feed-forward loop between SorLA and HER3 determines heregulin response and neratinib resistance. *Oncogene* **40**, 1300-1317, doi:10.1038/s41388-020-01604-5 (2021).
- 69 Faraj Shaglouf, L. H., Ranjpour, M., Wajid, S. & Jain, S. K. Elevated expression of cellular SYNE1, MMP10, and GTPase1 and their regulatory role in hepatocellular carcinoma progression. *Protoplasma* **257**, 157-167, doi:10.1007/s00709-019-01423-w (2020).
- 70 Kanda, M. *et al.* Significance of SYT8 For the Detection, Prediction, and Treatment of Peritoneal Metastasis From Gastric Cancer. *Ann Surg* **267**, 495-503, doi:10.1097/SLA.0000000000002096 (2018).
- 71 Zhao, Y. *et al.* Tryptophan 2, 3dioxygenase promotes proliferation, migration and invasion of ovarian cancer cells. *Mol Med Rep* **23**, doi:10.3892/mmr.2021.12084 (2021).
- 72 Vanova, T. *et al.* Tyrosine Kinase Expressed in Hepatocellular Carcinoma, TEC, Controls Pluripotency and Early Cell Fate Decisions of Human Pluripotent Stem Cells via Regulation of Fibroblast Growth Factor-2 Secretion. *Stem Cells* **35**, 2050-2059, doi:10.1002/stem.2660 (2017).
- 73 Ebert, M. P. *et al.* TFAP2E-DKK4 and chemoresistance in colorectal cancer. *N Engl J Med* **366**, 44-53, doi:10.1056/NEJMoa1009473 (2012).
- 74 Palomeras, S. *et al.* Epigenetic silencing of TGFBI confers resistance to trastuzumab in human breast cancer. *Breast Cancer Res* **21**, 79, doi:10.1186/s13058-019-1160-x (2019).
- 75 Huynh, L. K., Hipolito, C. J. & Ten Dijke, P. A Perspective on the Development of TGF-beta Inhibitors for Cancer Treatment. *Biomolecules* **9**, doi:10.3390/biom9110743 (2019).
- 76 Palmbo, P. L. *et al.* ATDC mediates a TP63-regulated basal cancer invasive program. *Oncogene* **38**, 3340-3354, doi:10.1038/s41388-018-0646-9 (2019).

- 77 Guan, Y., Bhandari, A., Zhang, X. & Wang, O. Uridine phosphorylase 1 associates to biological and clinical significance in thyroid carcinoma cell lines. *J Cell Mol Med* **23**, 7438-7448, doi:10.1111/jcmm.14612 (2019).
- 78 Park, E. R. *et al.* The mitochondrial hinge protein, UQCRH, is a novel prognostic factor for hepatocellular carcinoma. *Cancer Med* **6**, 749-760, doi:10.1002/cam4.1042 (2017).
- 79 Moody, T. W., Walters, J., Casibang, M., Zia, F. & Gozes, Y. VPAC1 receptors and lung cancer. *Ann N Y Acad Sci* **921**, 26-32, doi:10.1111/j.1749-6632.2000.tb06947.x (2000).
- 80 Moody, T. W., Nuche-Berenguer, B. & Jensen, R. T. Vasoactive intestinal peptide/pituitary adenylate cyclase activating polypeptide, and their receptors and cancer. *Curr Opin Endocrinol Diabetes Obes* **23**, 38-47, doi:10.1097/MED.0000000000000218 (2016).
- 81 McClurg, U. L. *et al.* Ubiquitin-specific protease 12 interacting partners Uaf-1 and WDR20 are potential therapeutic targets in prostate cancer. *Oncotarget* **6**, 37724-37736, doi:10.18632/oncotarget.6075 (2015).
- 82 Asem, M. S., Buechler, S., Wates, R. B., Miller, D. L. & Stack, M. S. Wnt5a Signaling in Cancer. *Cancers (Basel)* **8**, doi:10.3390/cancers8090079 (2016).
- 83 Escudero-Paniagua, B. *et al.* PAUF/ZG16B promotes colorectal cancer progression through alterations of the mitotic functions and the Wnt/beta-catenin pathway. *Carcinogenesis* **41**, 203-213, doi:10.1093/carcin/bgz093 (2020).
- 84 Zhang, X. F. *et al.* The role of ZNRF2 in the growth of non-small cell lung cancer. *Eur Rev Med Pharmacol Sci* **20**, 4011-4017 (2016).

**Table S4. Network Gene Alteration Frequency in Ovarian Cancer Patients**

Expression profiles of the growth-promoting oncogenic genes identified by datamining were analyzed for their expression profile using TCGA ovarian serous cystadenocarcinoma cancer dataset (TCGA Firehose Legacy). Number patients in which the expression of the respective genes were altered and the % patients altered (> 5%) were extracted from CBioPortal.

|    | Gene    | Patients Altered | Percent Patients Altered |
|----|---------|------------------|--------------------------|
| 1  | GPT     | 103              | 33%                      |
| 2  | LAMP3   | 91               | 29%                      |
| 3  | TP63    | 81               | 26%                      |
| 4  | CPB1    | 63               | 20%                      |
| 5  | ECM1    | 60               | 19%                      |
| 6  | CCDC81  | 49               | 16%                      |
| 7  | DMBX1   | 44               | 14%                      |
| 8  | CAGE1   | 43               | 14%                      |
| 9  | LAX1    | 43               | 14%                      |
| 10 | VIPR2   | 43               | 14%                      |
| 11 | PDE4DIP | 41               | 13%                      |
| 12 | NIBAN1  | 40               | 13%                      |
| 13 | PAG1    | 38               | 12%                      |
| 14 | CTLA4   | 36               | 12%                      |
| 15 | UQCRH   | 36               | 12%                      |
| 16 | COL16A1 | 34               | 11%                      |
| 17 | LOXHD1  | 31               | 10%                      |
| 18 | S100A16 | 31               | 10%                      |
| 19 | PAGE1   | 30               | 10%                      |
| 20 | TFAP2E  | 30               | 10%                      |
| 21 | DCDC2   | 29               | 9%                       |
| 22 | LMO1    | 29               | 9%                       |
| 23 | SORL1   | 29               | 9%                       |
| 24 | CPXM2   | 28               | 9%                       |
| 25 | PROP1   | 28               | 9%                       |
| 26 | SYT8    | 28               | 9%                       |
| 27 | IL6R    | 27               | 9%                       |
| 28 | ACKR3   | 26               | 8%                       |
| 29 | C1QTNF6 | 26               | 8%                       |
| 30 | PLA2G4A | 26               | 8%                       |
| 31 | SYNE1   | 26               | 8%                       |
| 32 | CCL20   | 25               | 8%                       |
| 33 | KDR     | 25               | 8%                       |
| 34 | TGFBI   | 25               | 8%                       |
| 35 | CD244   | 25               | 8%                       |
| 36 | NRG3    | 24               | 8%                       |
| 37 | PSG1    | 24               | 8%                       |
| 38 | SNAI3   | 24               | 8%                       |
| 39 | BAD     | 24               | 7%                       |
| 40 | APOC1   | 23               | 7%                       |
| 41 | MUC5B   | 22               | 7%                       |
| 42 | TDO2    | 22               | 7%                       |
| 43 | ATAT1   | 22               | 7%                       |
| 44 | PLXDC2  | 21               | 7%                       |
| 45 | LRRC1   | 21               | 6%                       |

|    |                |    |    |
|----|----------------|----|----|
| 46 | <i>WNT5A</i>   | 20 | 6% |
| 47 | <i>PSG6</i>    | 20 | 6% |
| 48 | <i>ABLIM1</i>  | 19 | 6% |
| 49 | <i>PDLIM5</i>  | 18 | 6% |
| 50 | <i>APBA1</i>   | 18 | 5% |
| 51 | <i>HES2</i>    | 17 | 5% |
| 52 | <i>NEURL2</i>  | 17 | 5% |
| 53 | <i>WDR20</i>   | 17 | 5% |
| 54 | <i>AHNAK2</i>  | 16 | 5% |
| 55 | <i>CSF1R</i>   | 16 | 5% |
| 56 | <i>PITPNM3</i> | 16 | 5% |
| 57 | <i>PSG9</i>    | 16 | 5% |
| 58 | <i>UPP1</i>    | 16 | 5% |
| 59 | <i>ASS1</i>    | 14 | 5% |
| 60 | <i>PLCD4</i>   | 14 | 5% |
| 61 | <i>VIP</i>     | 14 | 5% |

**Table S5. Co-occurrence of Network Genes in Ovarian Cancer Patients**

Network genes that show increased expression in more than 5% of the genes were analyzed for their co-expression using the co-occurrence parameter of the CBioPortal. Co-occurrence profile of the genes with the *p*-value of <0.001, was extracted from the CBioPortal using Ovarian Serous Cystadenocarcinoma (TCGA, Firehose Legacy). The dataset available at <https://www.cbioportal.org>.

| <i>Gene</i> | <i>Gene</i> | <i>p-Value</i> | <i>Tendency</i> |
|-------------|-------------|----------------|-----------------|
| LAMP3       | TP63        | <0.001         | Co-occurrence   |
| S100A16     | IL6R        | <0.001         | Co-occurrence   |
| PSG6        | PSG9        | <0.001         | Co-occurrence   |
| PSG1        | PSG6        | <0.001         | Co-occurrence   |
| PSG1        | PSG9        | <0.001         | Co-occurrence   |
| NIBAN1      | PLA2G4A     | <0.001         | Co-occurrence   |
| DMBX1       | UQCRH       | <0.001         | Co-occurrence   |
| ECM1        | S100A16     | <0.001         | Co-occurrence   |
| DCDC2       | ATAT1       | <0.001         | Co-occurrence   |
| LAMP3       | CPB1        | <0.001         | Co-occurrence   |
| ECM1        | IL6R        | <0.001         | Co-occurrence   |
| TP63        | CPB1        | <0.001         | Co-occurrence   |
| APOC1       | PSG9        | <0.001         | Co-occurrence   |
| IL6R        | CD244       | <0.001         | Co-occurrence   |
| CCDC81      | BAD         | <0.001         | Co-occurrence   |
| COL16A1     | TGFB1       | <0.001         | Co-occurrence   |
| APOC1       | PSG6        | <0.001         | Co-occurrence   |
| NIBAN1      | CD244       | <0.001         | Co-occurrence   |
| ECM1        | PDE4DIP     | <0.001         | Co-occurrence   |
| KDR         | PDLIM5      | <0.001         | Co-occurrence   |
| PSG1        | APOC1       | <0.001         | Co-occurrence   |
| COL16A1     | C1QTNF6     | <0.001         | Co-occurrence   |
| ACKR3       | PLCD4       | <0.001         | Co-occurrence   |
| S100A16     | CD244       | <0.001         | Co-occurrence   |
| PLA2G4A     | CD244       | <0.001         | Co-occurrence   |
| CAGE1       | DCDC2       | <0.001         | Co-occurrence   |
| PDE4DIP     | S100A16     | <0.001         | Co-occurrence   |
| CAGE1       | ATAT1       | <0.001         | Co-occurrence   |
| UQCRH       | TFAP2E      | <0.001         | Co-occurrence   |
| PDE4DIP     | IL6R        | <0.001         | Co-occurrence   |
| CTLA4       | DCDC2       | <0.001         | Co-occurrence   |
| PAG1        | NRG3        | <0.001         | Co-occurrence   |
| LAX1        | NIBAN1      | <0.001         | Co-occurrence   |
| C1QTNF6     | TGFB1       | <0.001         | Co-occurrence   |
| SYNE1       | VIP         | <0.001         | Co-occurrence   |
| COL16A1     | TFAP2E      | <0.001         | Co-occurrence   |
| ATAT1       | NEURL2      | <0.001         | Co-occurrence   |
| PAGE1       | IL6R        | <0.001         | Co-occurrence   |
| S100A16     | PLA2G4A     | <0.001         | Co-occurrence   |
| DMBX1       | ATAT1       | <0.001         | Co-occurrence   |
